# Supplementary material for: Guest–guest and guest–host interactions in ethanol, propan-1-ol, and propan-2-ol clathrate hydrate forming systems
Source: Royal Society of Chemistry journal article supplement (doi:10.1039/c8nj00750k), 2018-01-01
Supplement: c8nj00750k1.pdf [file c8nj00750k1.pdf]

## Supporting information

# Guest–guest and guest–host interactions in ethanol, propan-1-ol, and propan-2-ol clathrate hydrate forming systems

K. Yasuda,<sup>a,b,c</sup> R. Ohmura<sup>a</sup> and A. K. Sum<sup>b</sup>

a. Department of Mechanical Engineering, Keio University, 3-14-1 Hiyoshi, Kohoku-ku,  
Yokohama 223-8522, Japan

b. Hydrates Energy Innovation Laboratory, Chemical and Biological Engineering Department,  
Colorado School of Mines, Golden, CO 80401, USA

c. Energy and Environment Program, School of Engineering, University of the Ryukyus, 1  
Senbaru, Nishihara, Okinawa 902-0213, Japan

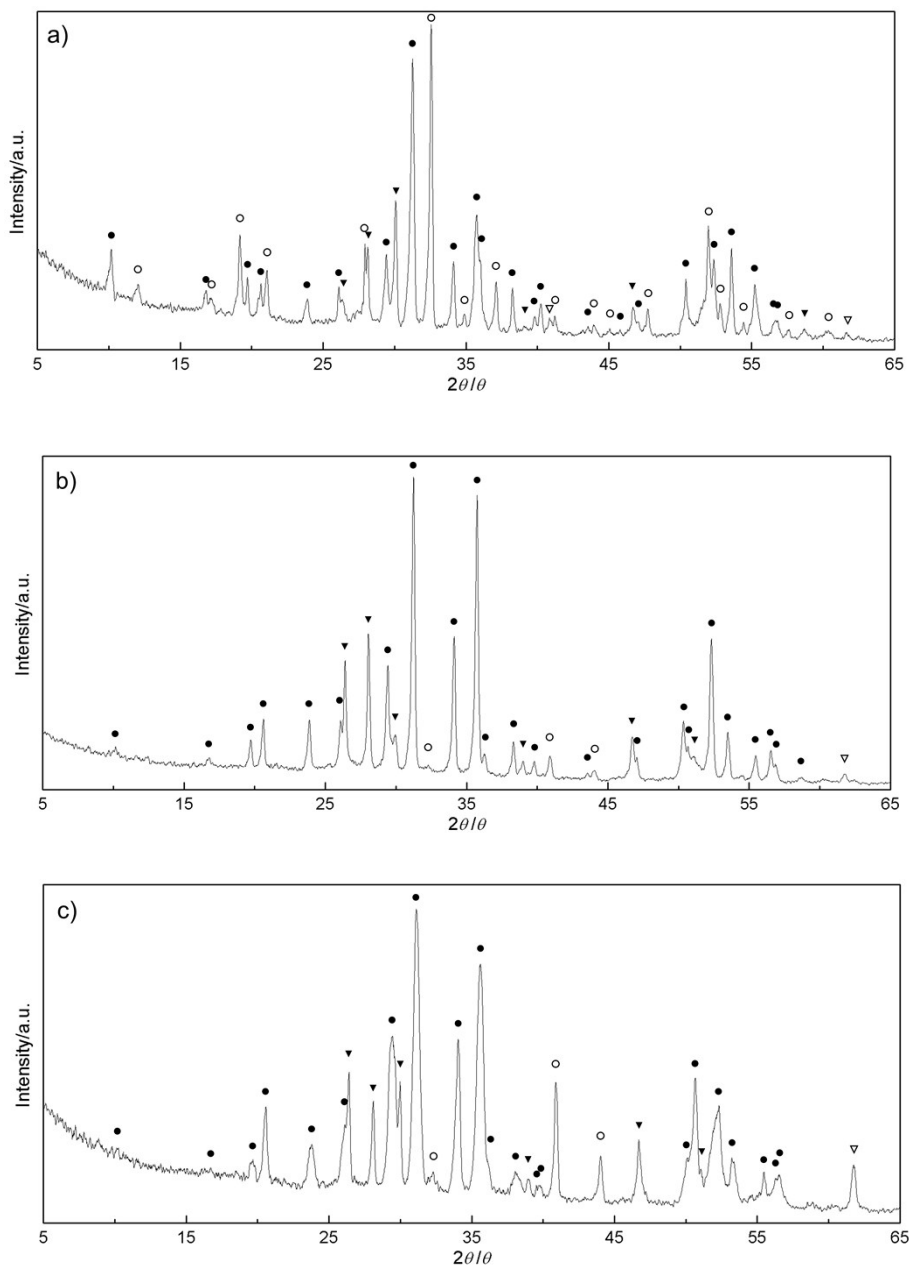

Figure S1. PXRD patterns collected for (a) the  $\text{CD}_4$  + ethanol +  $\text{D}_2\text{O}$  system, (b) the  $\text{CD}_4$  + propan-1-ol +  $\text{D}_2\text{O}$  system, and (c) the  $\text{CD}_4$  + propan-2-ol +  $\text{D}_2\text{O}$  system.  $\infty$ : Structure II hydrate.  $\infty$ : Structure I hydrate.  $\square$ : Ice Ih.  $\blacklozenge$ :  $\alpha\text{-Al}_2\text{O}_3$ . The lattice constant for structure II hydrates in each system is 17.25 Å (ethanol), 17.26 Å (propan-1-ol), and 17.31 Å (propan-2-ol).
